# Supplementary material
Source: PubMed Central journal article supplement (PMC6482957)

# Uncropped Western blots images for Fig 1b

α-GST for peptide pull-down

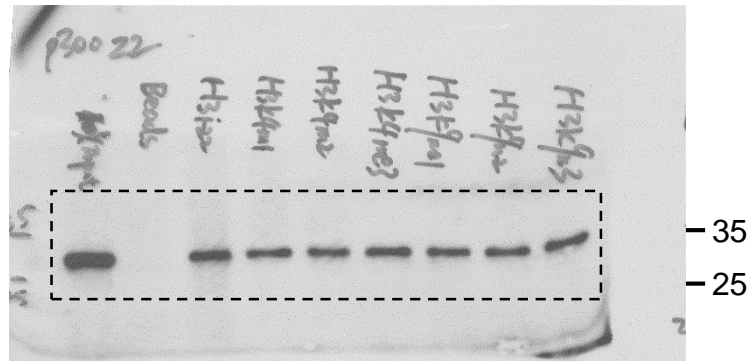

α-GST for peptide pull-down

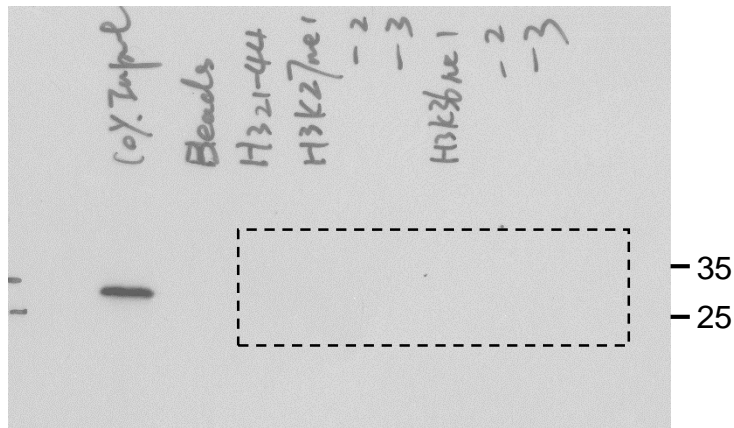

α-GST for peptide pull-down

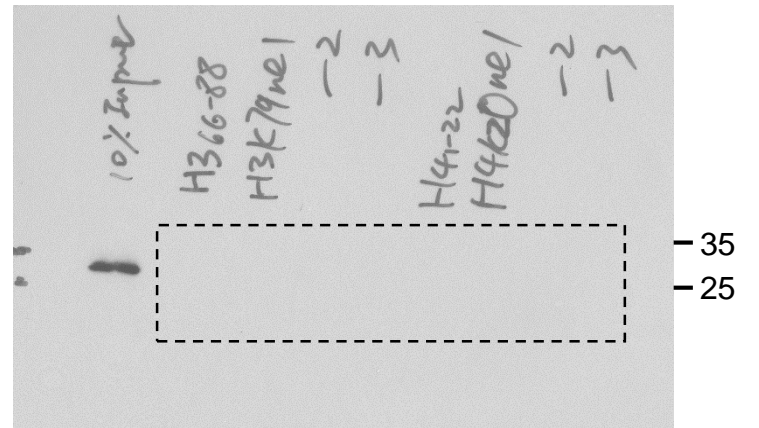

# Uncropped Western blots images for Fig 1c

α-GST for peptide pull-down

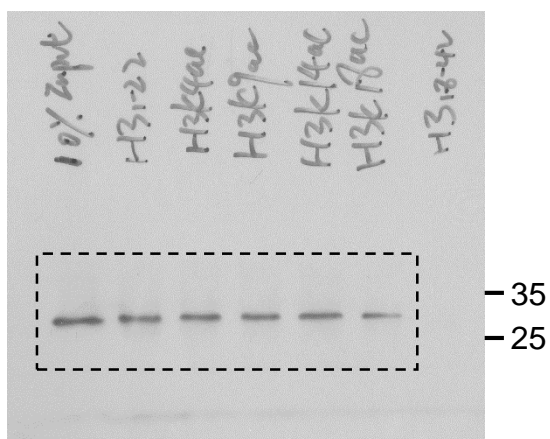

α-GST for peptide pull-down

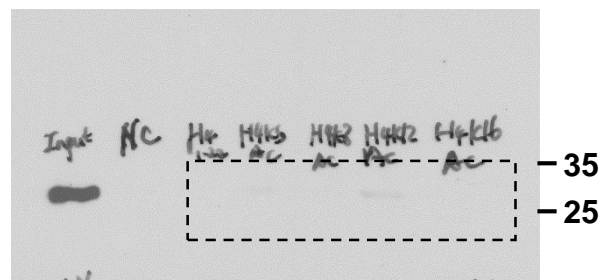

**Uncropped Western blots images for Fig 2d**

**Uncropped Western blots images for Fig 2e**

α-GST for peptide pull-down

α-GST for peptide pull-down

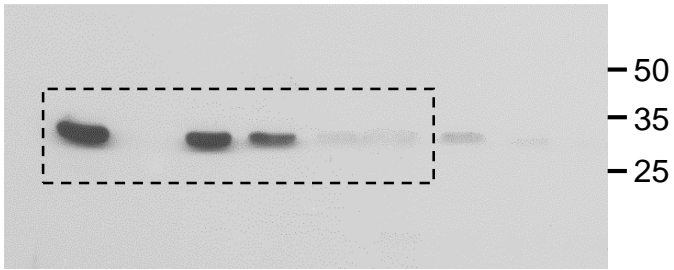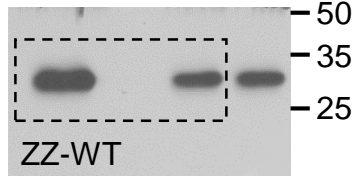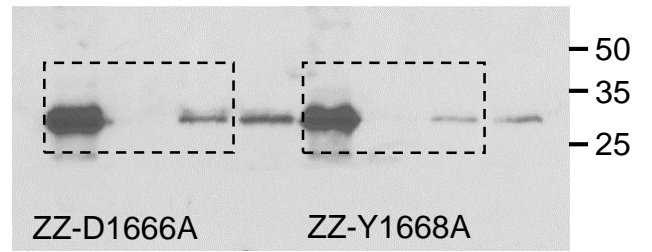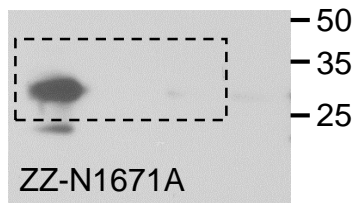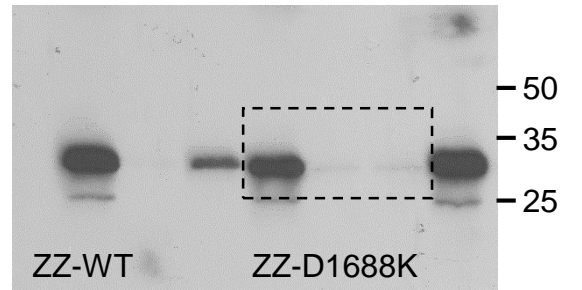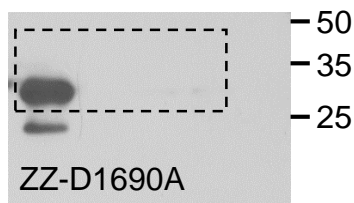

**Uncropped Western blots images for Fig 2f**

**Uncropped Western blots images for Fig 2g**

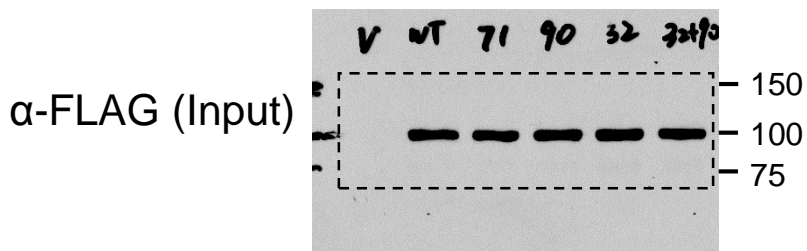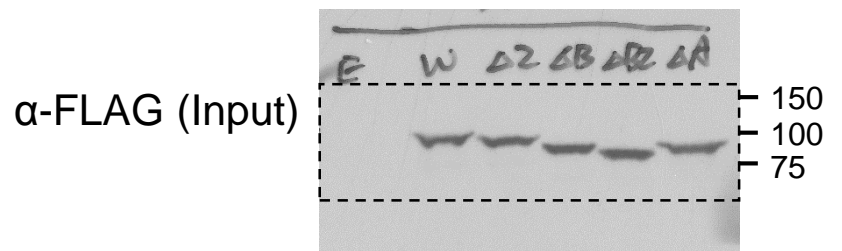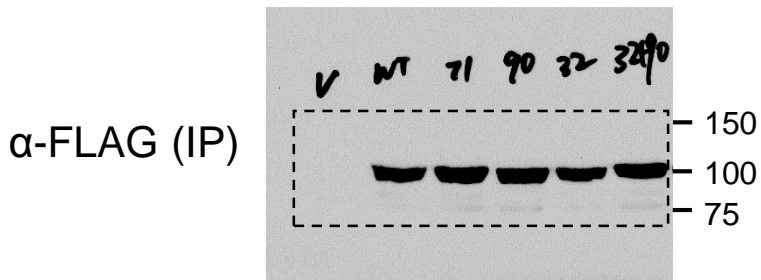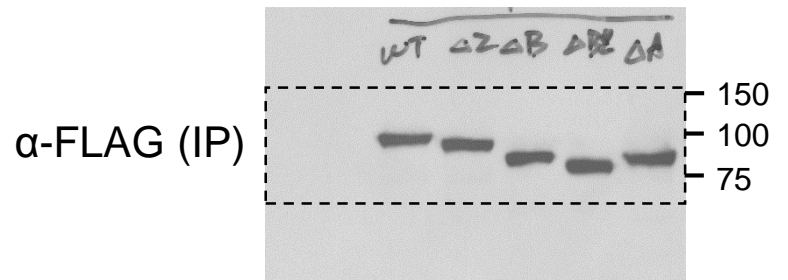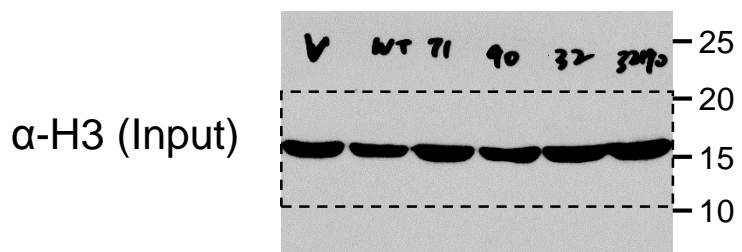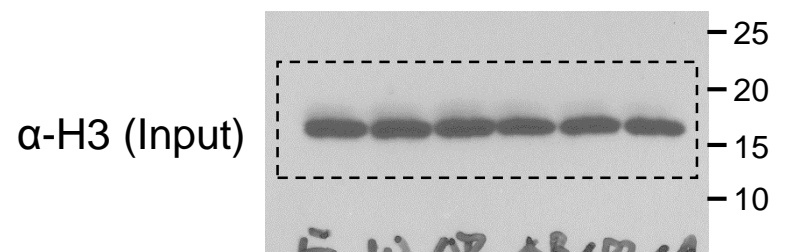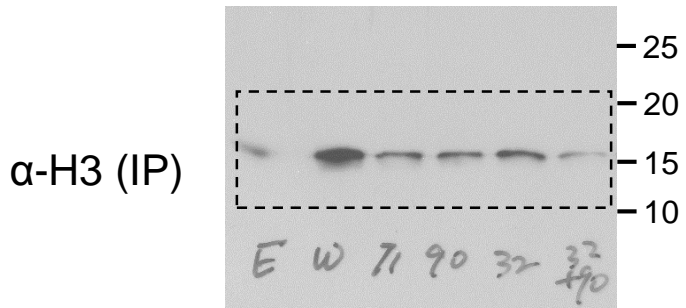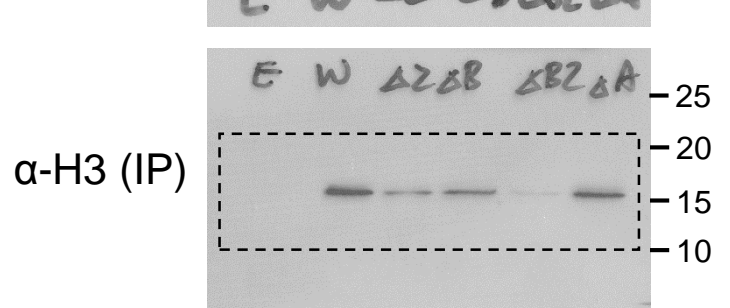

## Uncropped Western blots images for Fig 3e

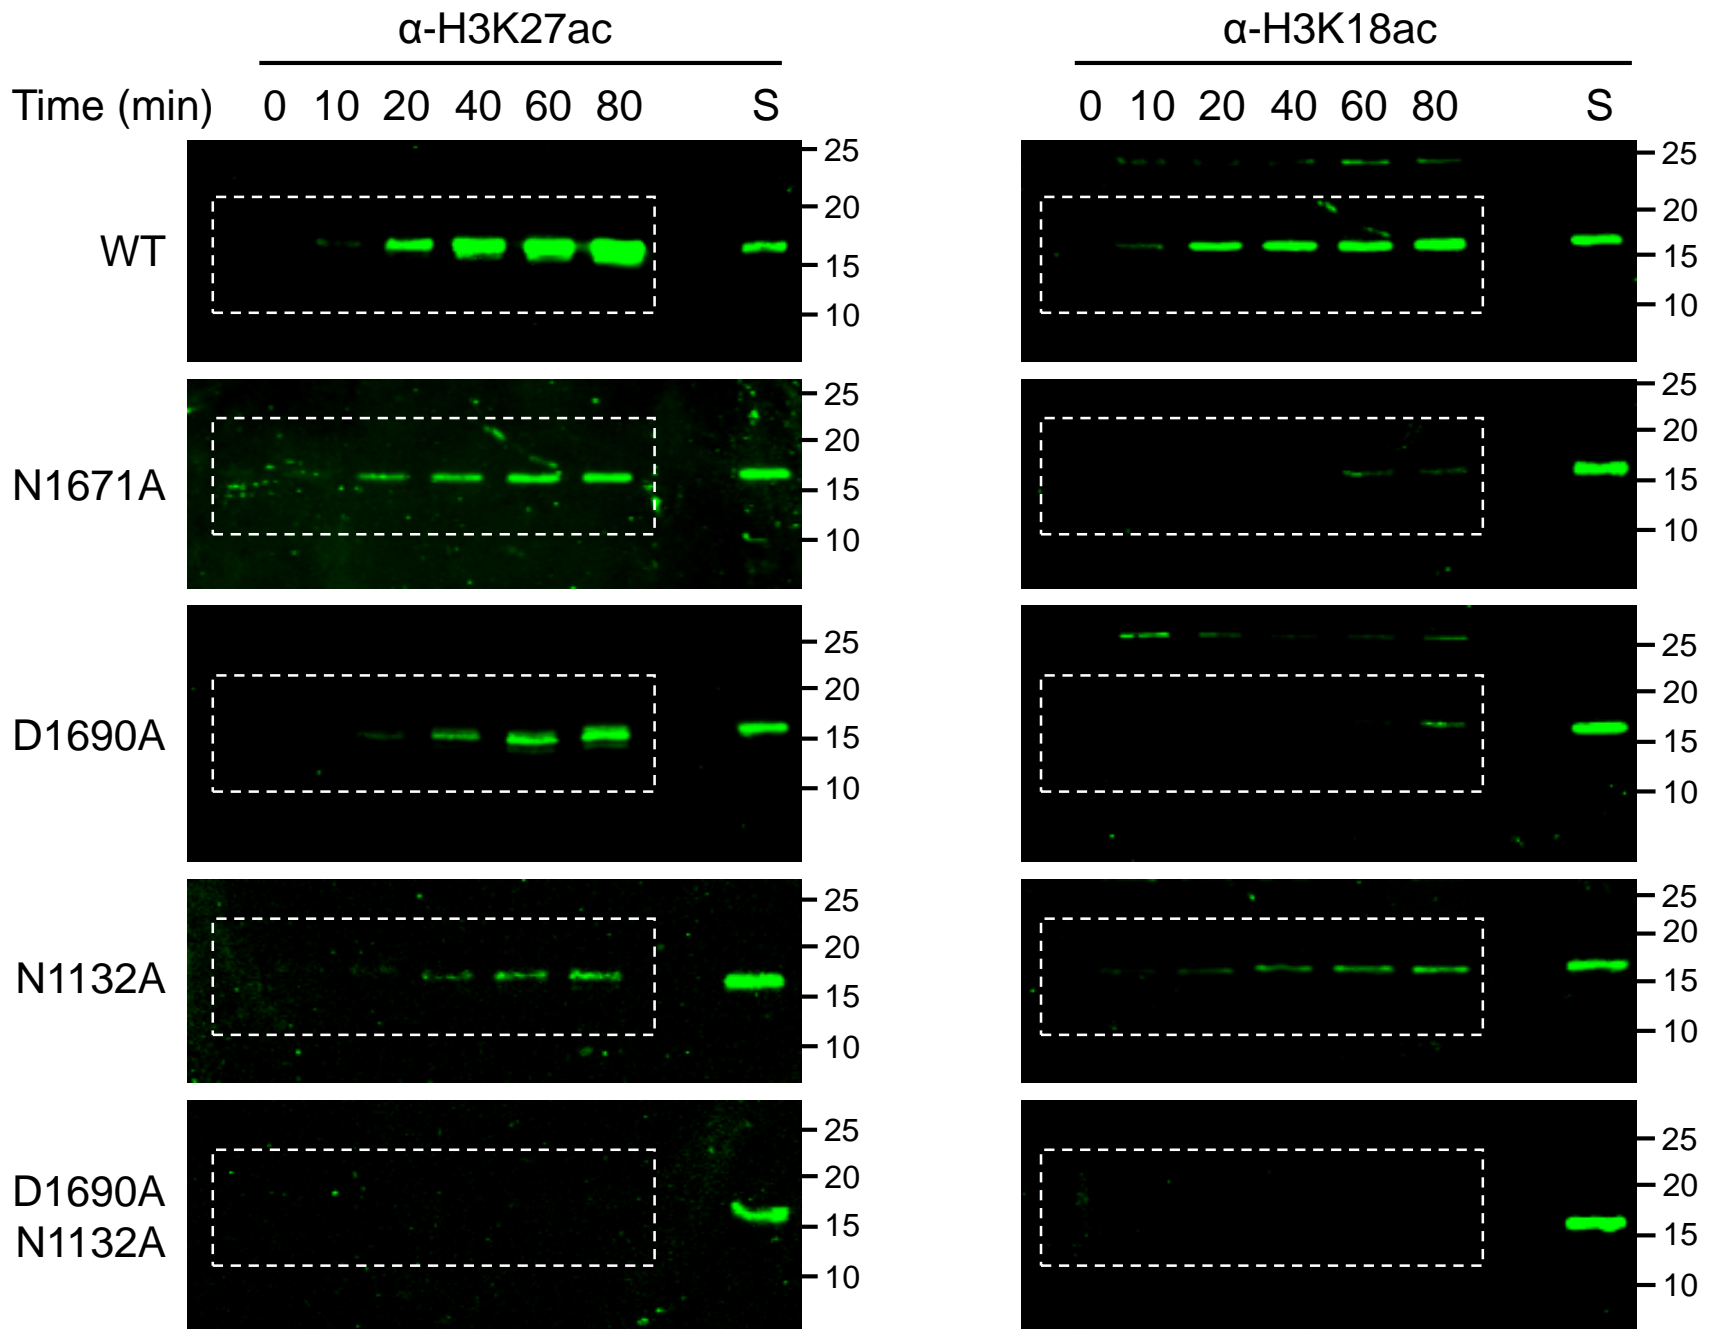

S: the common standard sample for comparing signals from different gels.

# Uncropped Western blots images for Fig 3h

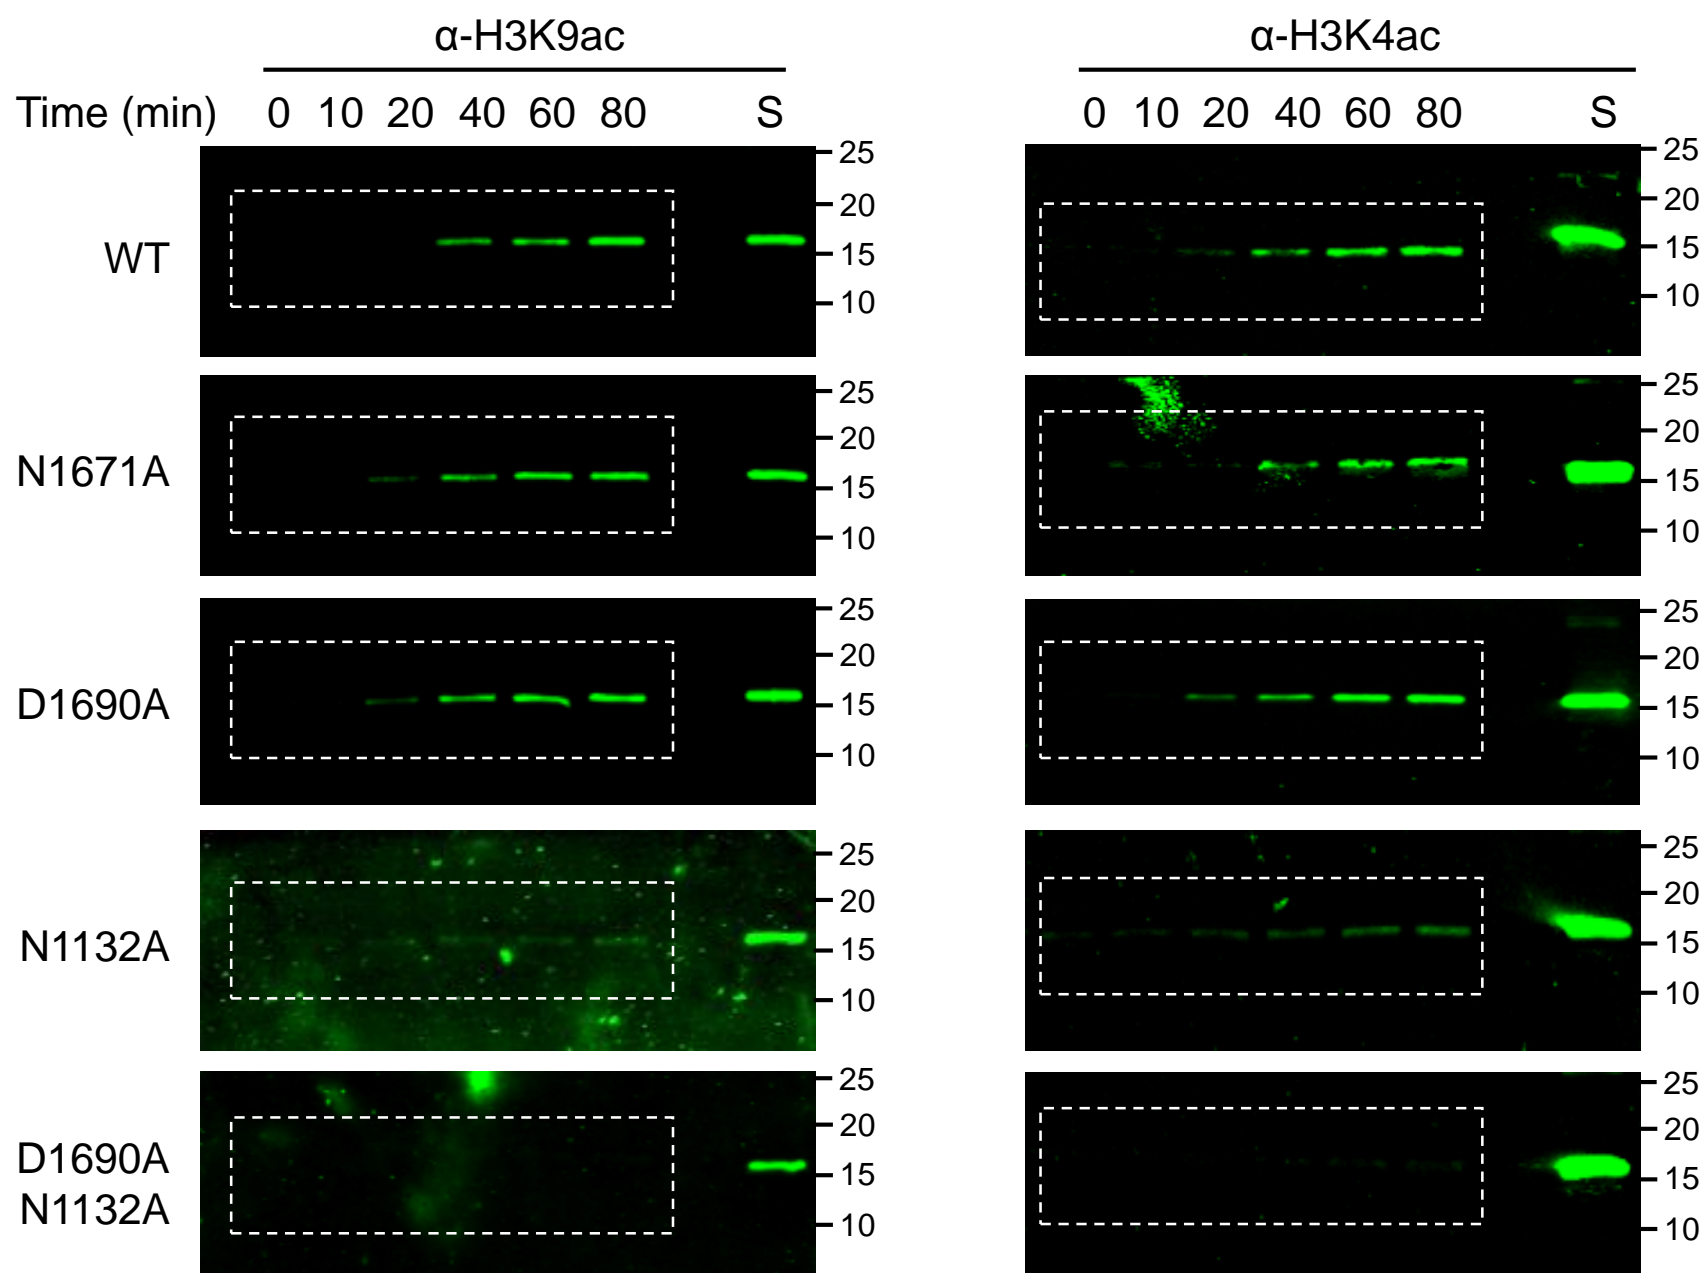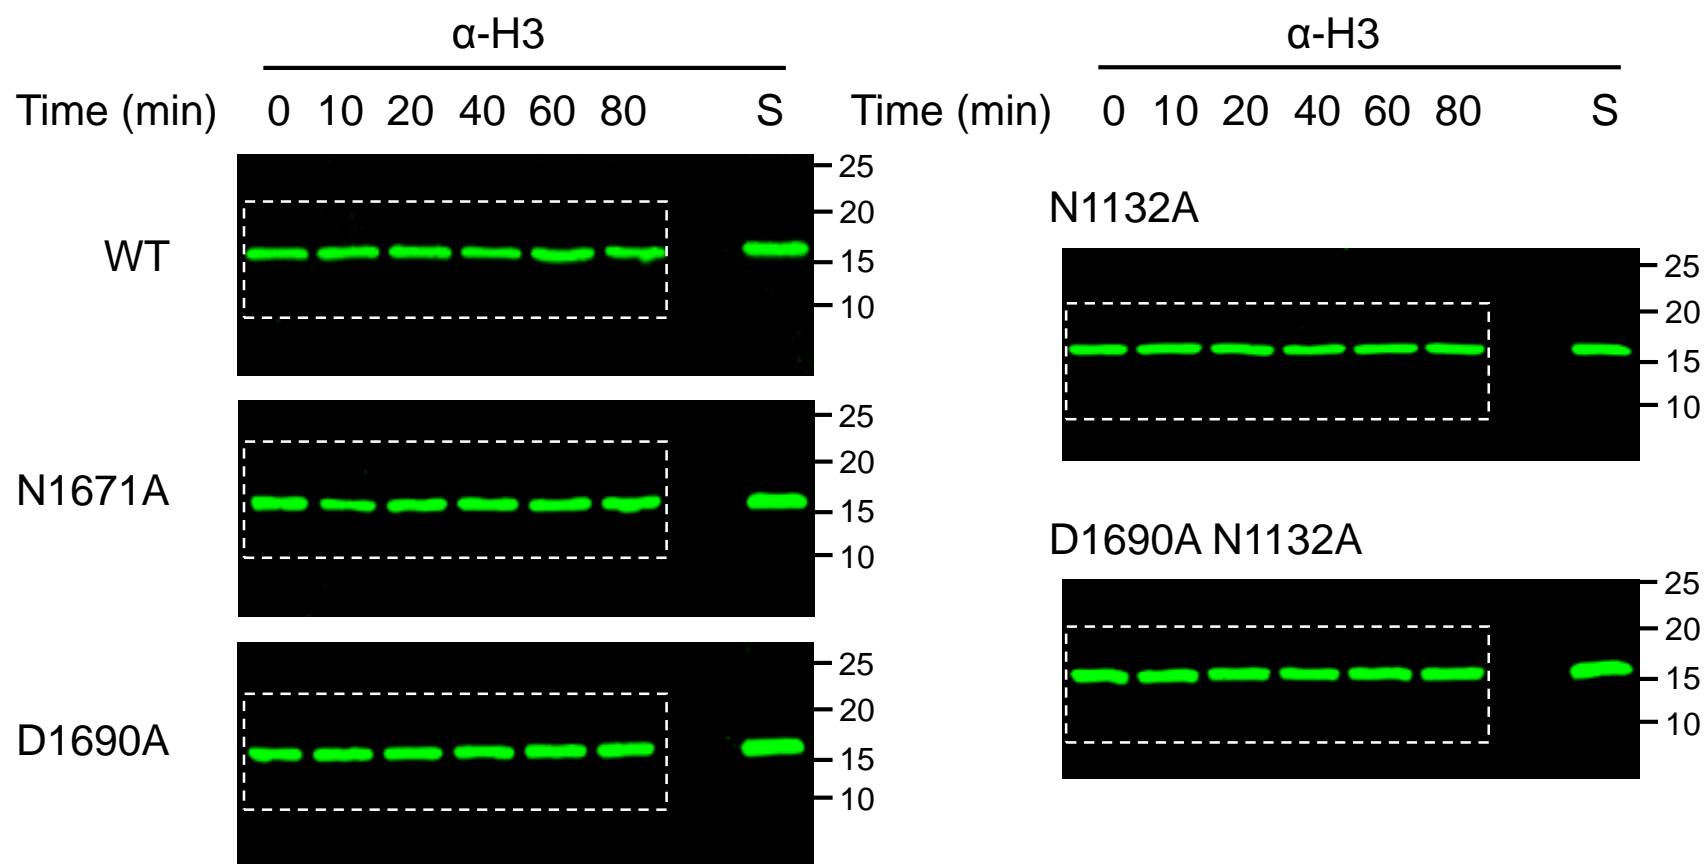

S: the common standard sample for comparing signals from different gels.

# Uncropped Western blots images for Fig 4a

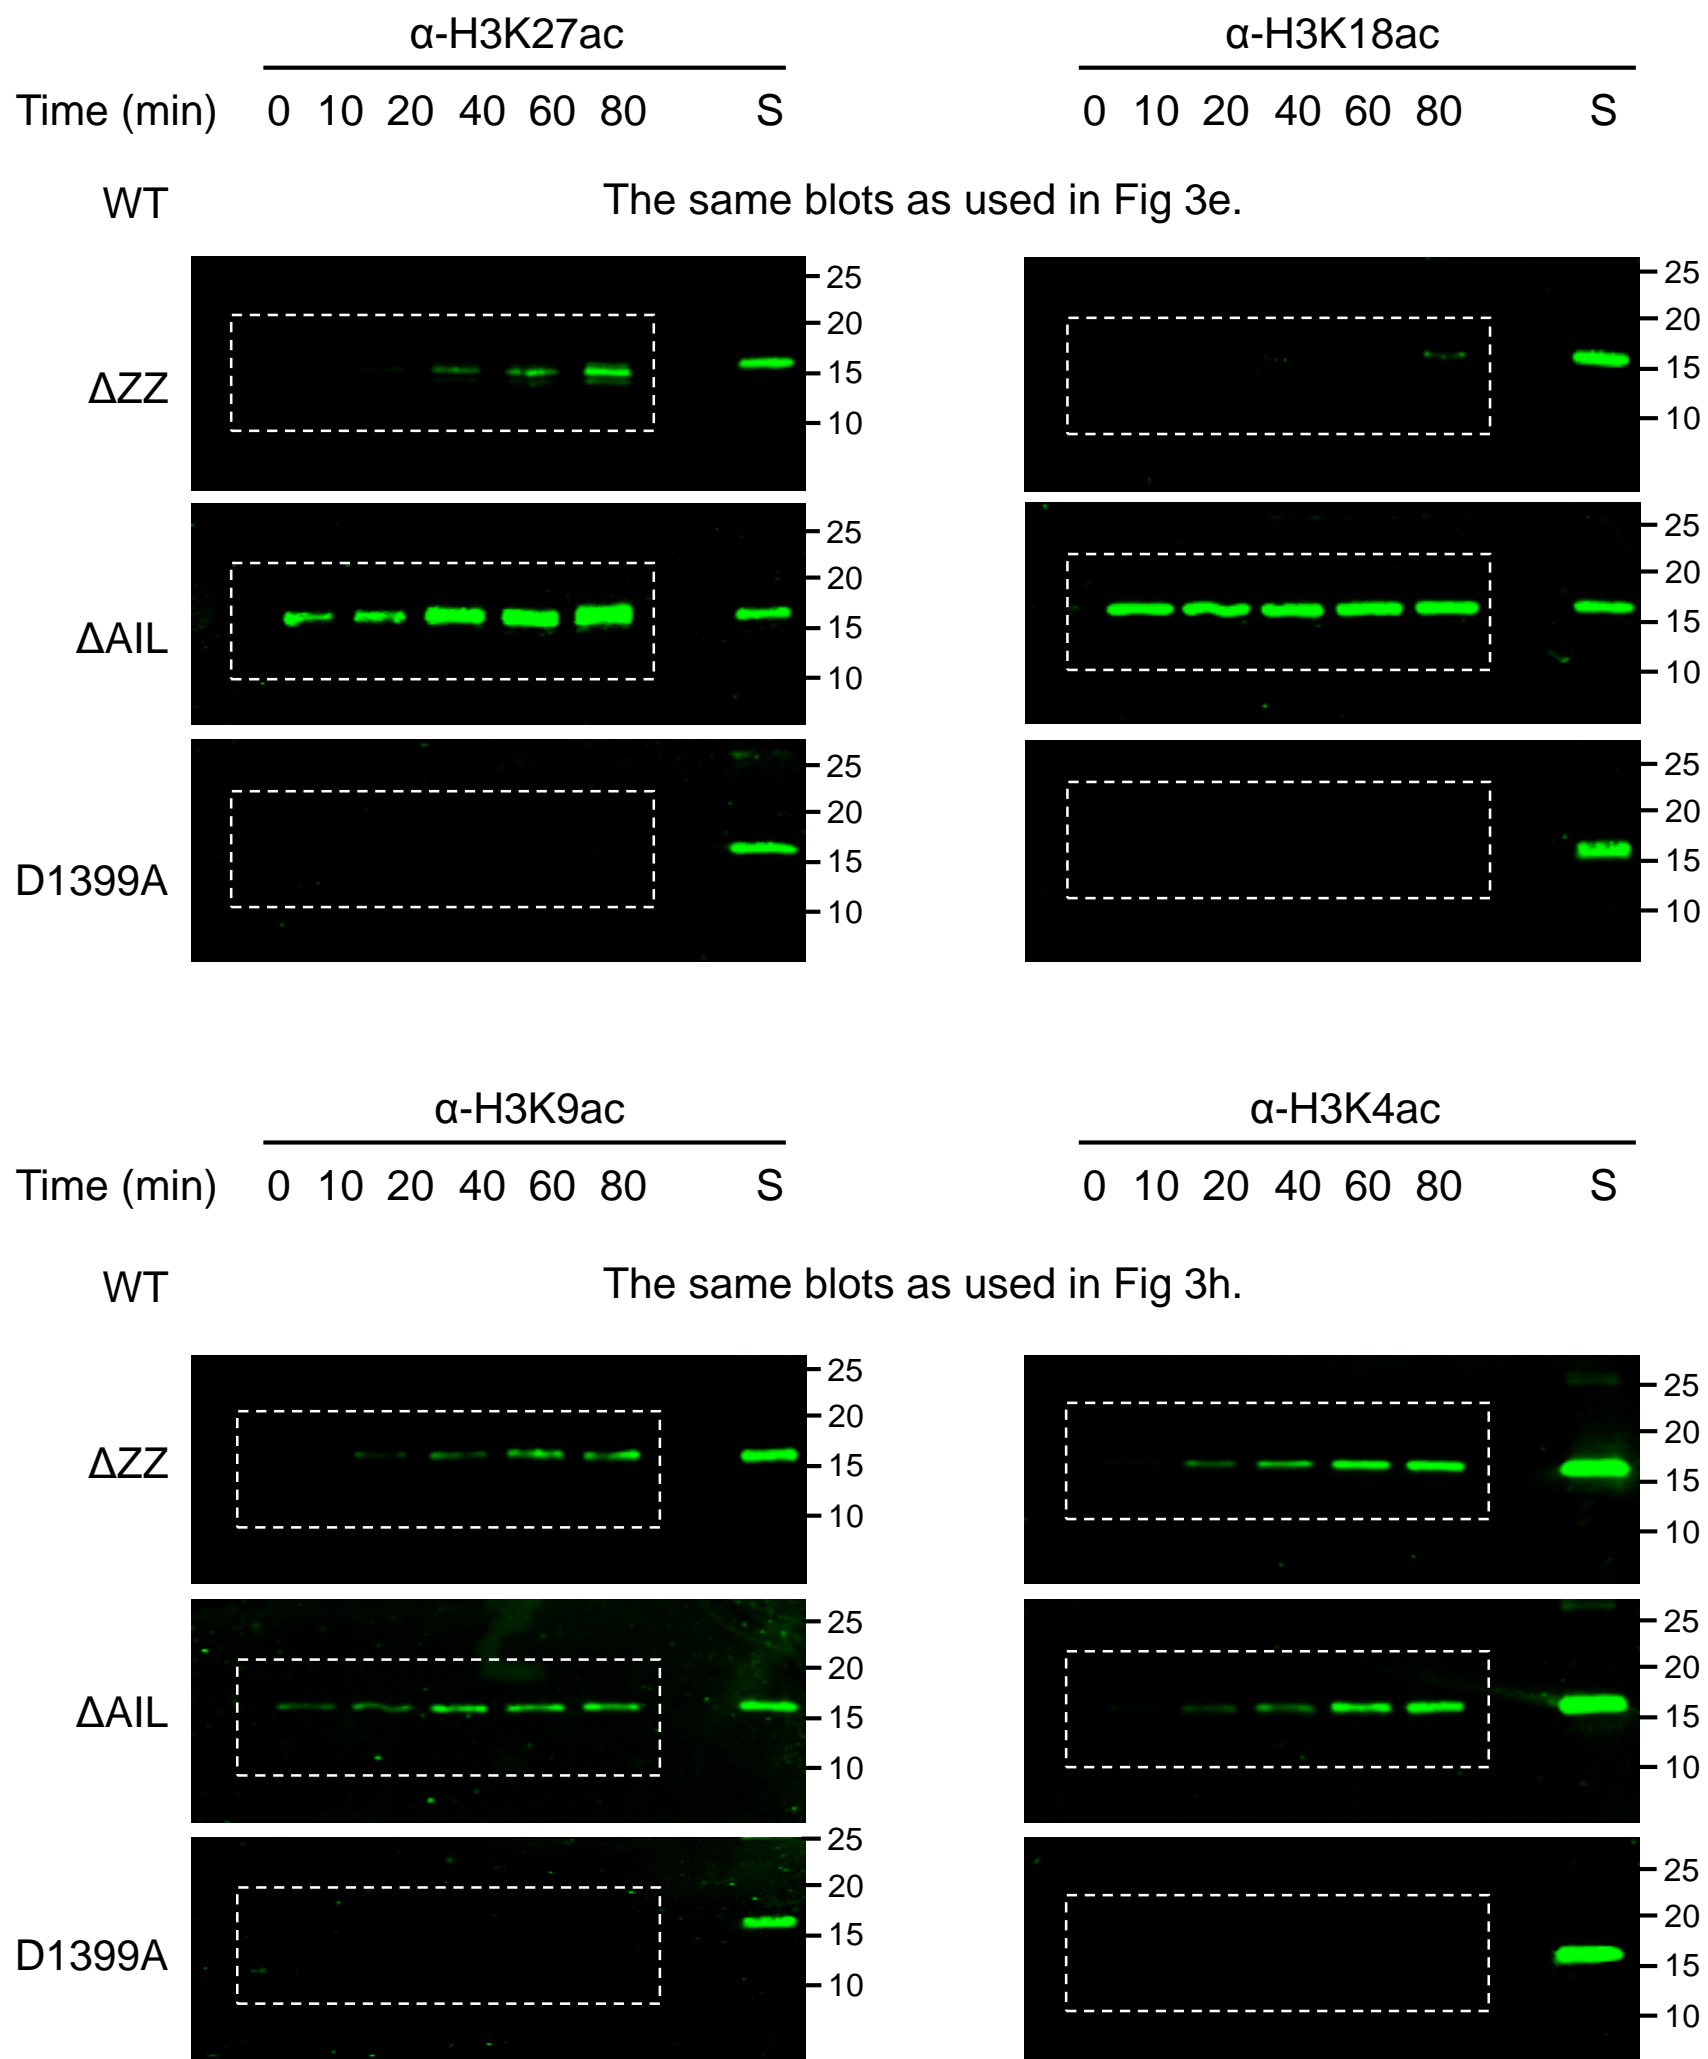

S: the common standard sample for comparing signals from different gels.

## Uncropped Western blots images for Fig 4a (continue)

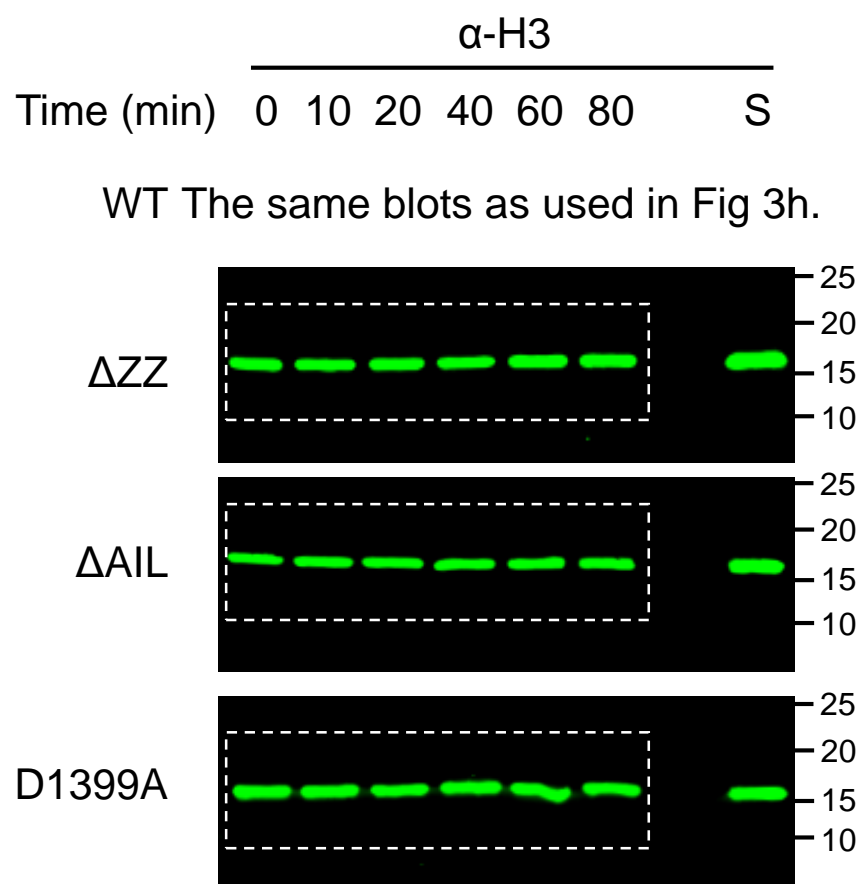

S: the common standard sample for comparing signals from different gels.

## Uncropped Western blots images for Fig 4f

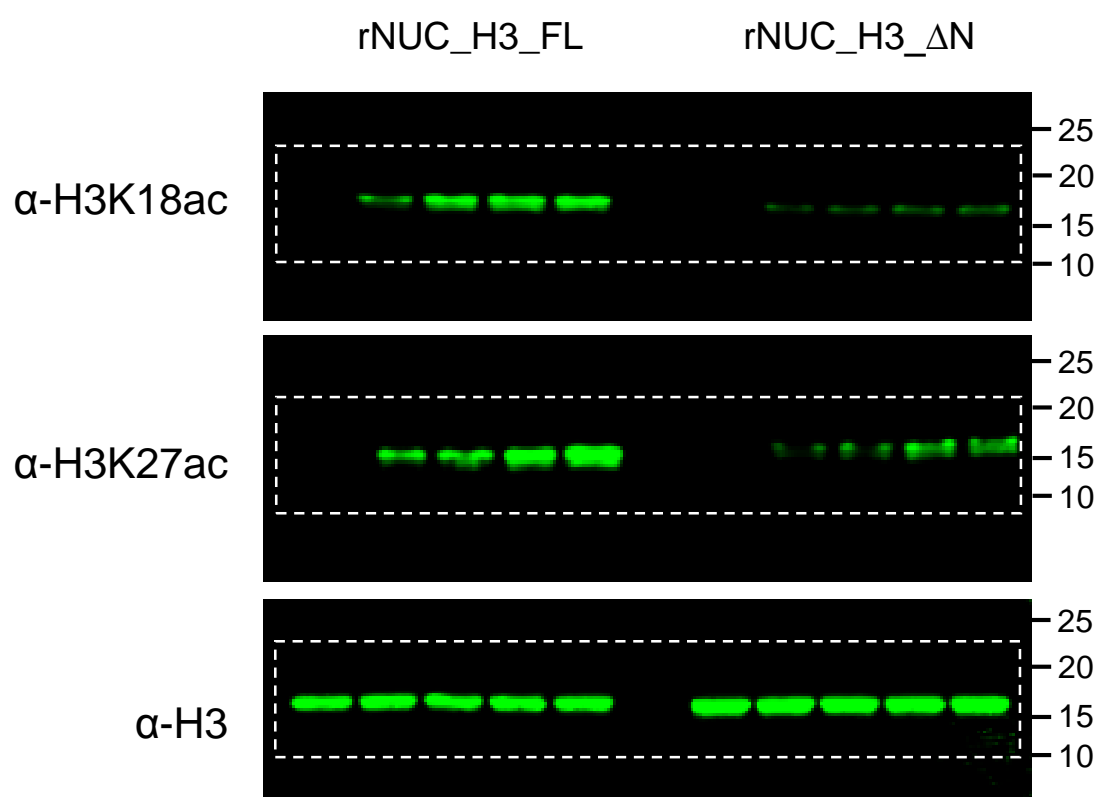

### Uncropped Western blots images for Fig 5c

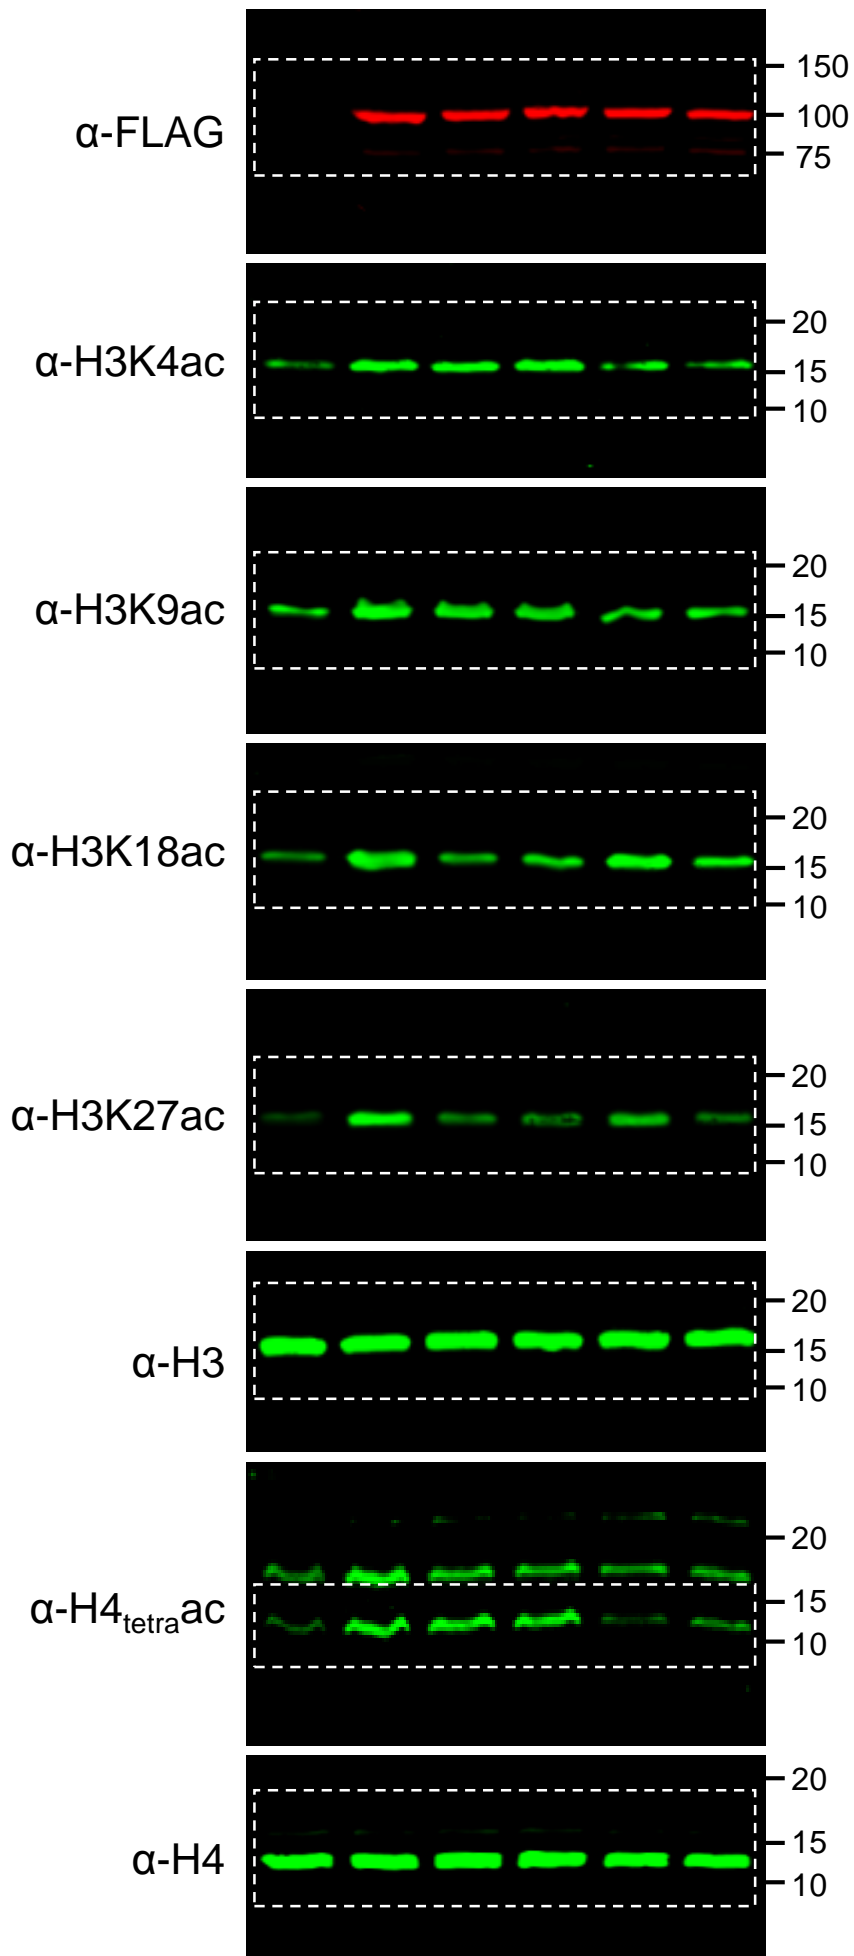

### Uncropped Western blots images for Fig 5e

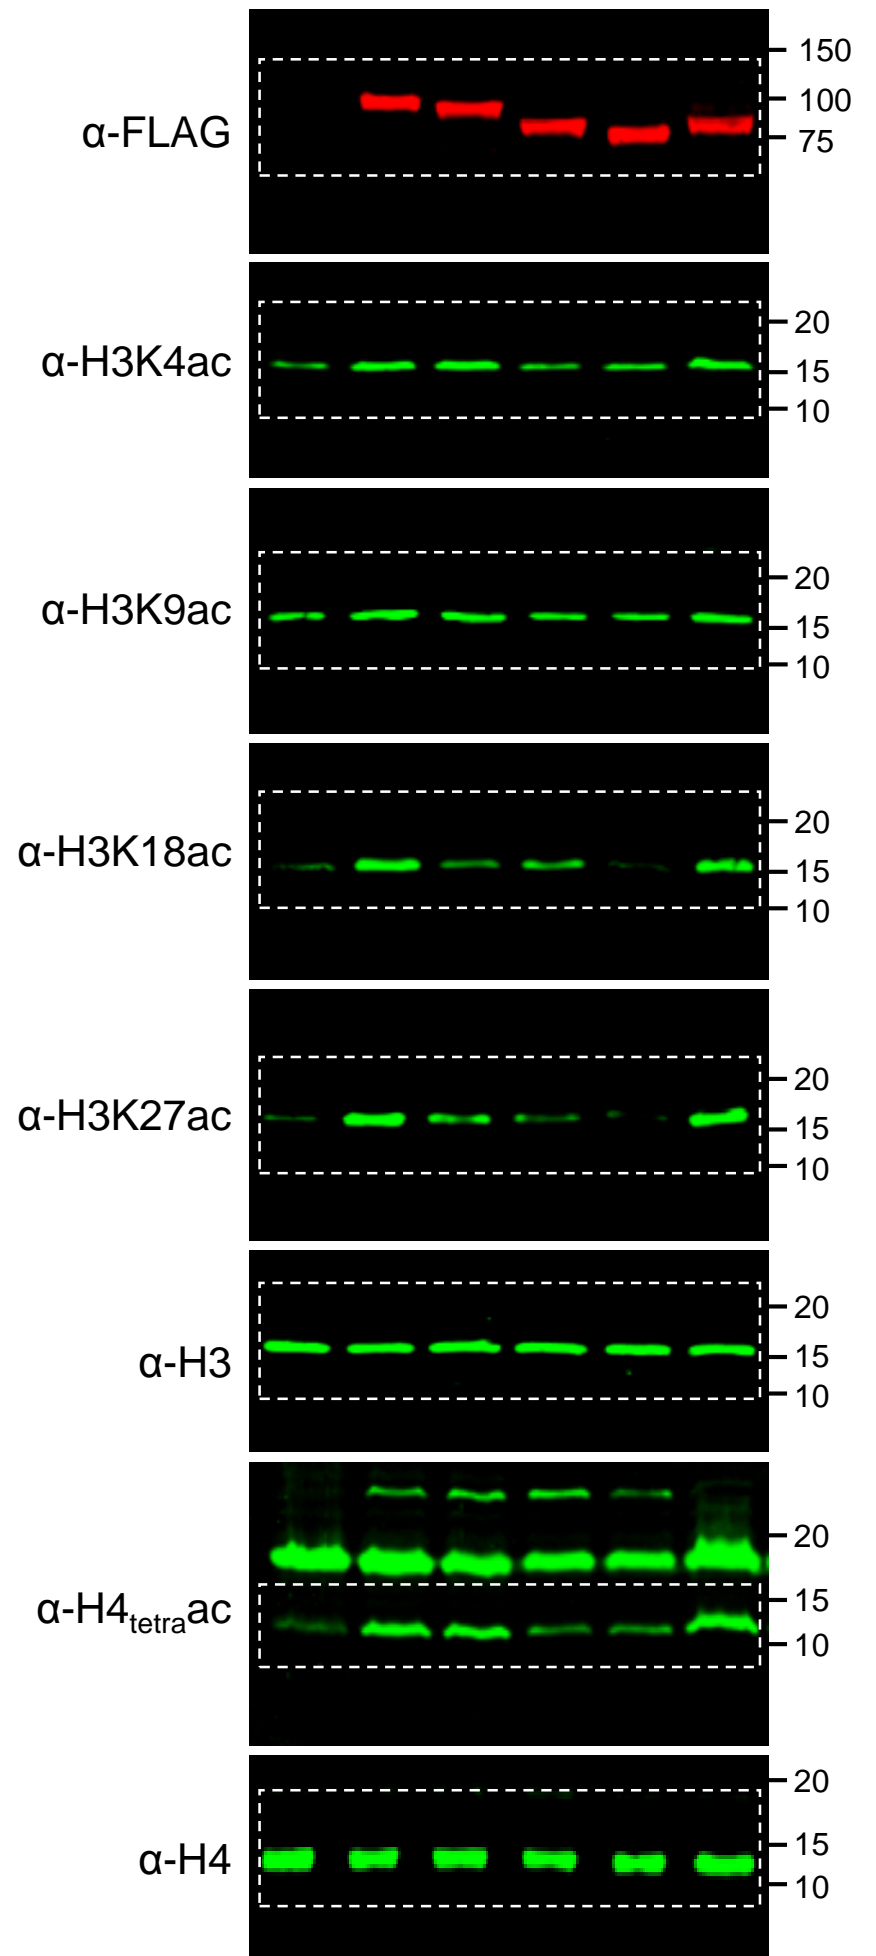

Supplement: NIHMS1500330-supplement-1.pdf [file NIHMS1500330-supplement-1.pdf]
